# Supplementary material for: lncRNA DLEU2 acts as a miR-181a sponge to regulate SEPP1 and inhibit skeletal muscle differentiation and regeneration
Source: publisher site journal article supplement (doi:10.18632/aging.104095), 2020-11-18
Supplement: Supplementary file [file aging-v12i23-104095-supplementary-material-SD1.pdf]

SUPPLEMENTARY FIGURE

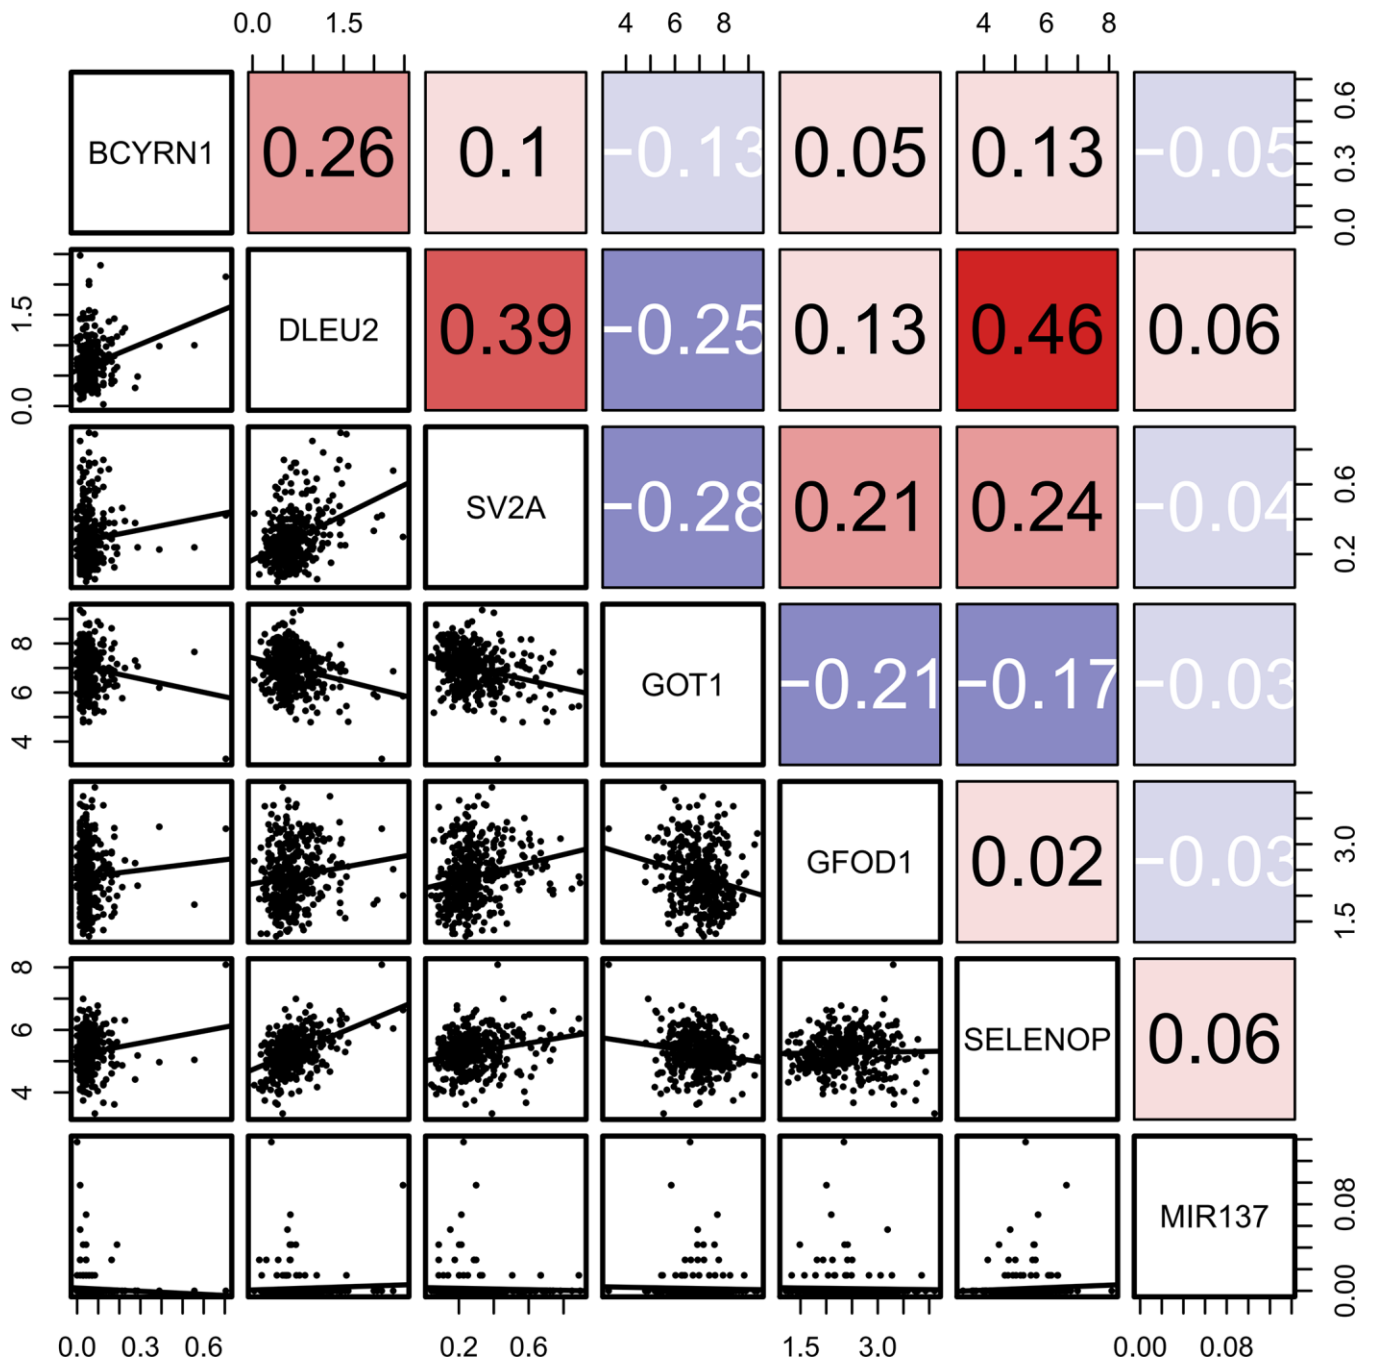

Supplementary Figure 1. Correlations among BCYRN1, DLEU2, SV2A, GOT1, GFOD1, SELENOP (SEPP1) and miR-137. The correlations shown are for muscle tissues from GTEX cohorts (n=396).
